# Supplementary material for: Methodological Quality of Manuscripts Reporting on the Usability of Mobile Applications for Pain Assessment and Management: A Systematic Review
Source: PubMed Central journal article supplement (PMC7038093; doi:10.3390/ijerph17030785), 2020-01-27
Supplement: ijerph-17-00785-s001.pdf [file ijerph-17-00785-s001.pdf]

**Table S1.** Overview of the manuscripts included in the systematic review.

| Authors                     | App                                              | App Aim    | Individuals Involved In The Usability Assessment                                                                                              | Use Case                                                                                                      | Domain Assessed                        | Method Of Usability Assessment Used                                                                                                                                                                                | Usability Outcome                                                                                                                                                                                                                                                                                                                                                                                                                                                      | Reviewers Comments             |
|-----------------------------|--------------------------------------------------|------------|-----------------------------------------------------------------------------------------------------------------------------------------------|---------------------------------------------------------------------------------------------------------------|----------------------------------------|--------------------------------------------------------------------------------------------------------------------------------------------------------------------------------------------------------------------|------------------------------------------------------------------------------------------------------------------------------------------------------------------------------------------------------------------------------------------------------------------------------------------------------------------------------------------------------------------------------------------------------------------------------------------------------------------------|--------------------------------|
| <b>Dantas_2016 [25]</b>     | Dor de Cabeça; Diário da Dor; Diário da Cefaleia | Assessment | End users<br>N = 22<br><br>Characteristics<br>54.5% (n=12) female and 45.5% (n=10) males; mean ( $\pm$ SD) age of 72.3 ( $\pm$ 8.2) years old | Not specified                                                                                                 | Efficiency, Effectiveness Satisfaction | International Classification of Functioning - Usability Scale I (ICF-US I);<br><br>Performance evaluation:<br>i) Number of attempts to complete tasks<br>ii) Completion rates<br>iii) Time taken to complete tasks | ICF results:<br>Dor de Cabeça (Mean $\pm$ sd ICF_US I=25.4 $\pm$ 0.4),<br>Diário da Dor (Mean $\pm$ sd ICF_US I=24.7 $\pm$ 3.9)<br>Diário da Cefaleia (Mean $\pm$ sd ICF_US I= 13.6 $\pm$ 3.7)<br><br>Time to complete tasks:<br>Diário da Cefaleia (mean $\pm$ sd=7.1 $\pm$ 3.3min)<br>Dor de Cabeça (mean $\pm$ sd=6.2 $\pm$ 2.9 min)<br>Diário da Dor (mean $\pm$ sd=5.1 $\pm$ 2.7 min)                                                                             |                                |
| <b>Reynoldson_2014 [26]</b> | 1. Manage My Pain;<br>2. Pain Scale              | Assessment | End users<br>N = 41 (aged 19–59 years, with experience of chronic or recurrent pain)                                                          | Record 2 pain episodes (average level of pain they regularly experience and worst pain they have experienced) | Efficiency Effectiveness Satisfaction  | 1. Time taken to complete a data entry task on the app;<br>2. SUS<br>3. Design questionnaire;<br>4. App use questionnaire                                                                                          | Usability task timings<br>Manage My Pain - ranged from 1'22" to 6'09" (mean = 3'01"; SD= 1'14") for the first entry and from 0'44" to 4'05" (mean = 2'00"; SD= 0'49") for the second entry.<br>Pain Scale app - ranged from 0'02" to 0'59" (mean = 0'19";SD= 0'12") for the first entry and from 0'02" to 0'37" (mean = 0'14"; SD= 0'08") for the second entry.<br><br>SUS ManageMyPain scores ranged from 57.5 to 100.<br>SUS PainScale scores ranged from 60 to 100. |                                |
| <b>Spyridonis_2014 [28]</b> | PainDroid                                        | Assessment | End users<br>N = 7 wheelchair users (3 fem; 4 males) with some                                                                                | 1. Start the app                                                                                              | Satisfaction                           | Questionnaire adapted from SUS                                                                                                                                                                                     | Positive trends in the questions 2 and 3, regarding ease of use.                                                                                                                                                                                                                                                                                                                                                                                                       | Total score of the SUS adapted |

|                    |             |              |                                                                                                                                                                                                                           |                                                                                                                                                                                            |                                                      |                                                                                                                                                     |                                                                                                                                                                                                                                                                                                                                                                                                                    |                                       |
|--------------------|-------------|--------------|---------------------------------------------------------------------------------------------------------------------------------------------------------------------------------------------------------------------------|--------------------------------------------------------------------------------------------------------------------------------------------------------------------------------------------|------------------------------------------------------|-----------------------------------------------------------------------------------------------------------------------------------------------------|--------------------------------------------------------------------------------------------------------------------------------------------------------------------------------------------------------------------------------------------------------------------------------------------------------------------------------------------------------------------------------------------------------------------|---------------------------------------|
|                    |             |              | <p>arm mobility problems, ranging in age from 21 to 65 years (mean age 41.1)</p> <p>Experts<br/>N = 2 clinicians (a General Practitioner-GP- and a Rheumatologist-RH)</p>                                                 | <p>2. Rotate left/right, rotate up/down<br/>3. Re-center<br/>4. Zoom in/out and drag<br/>5. Reset<br/>6. Use above to select pain type and pain location on model<br/>7. Save and exit</p> |                                                      |                                                                                                                                                     | <p>There was strong disagreement with statements targeting the amount of learning required to have in order to use PainDroid.</p>                                                                                                                                                                                                                                                                                  | <p>questionnaire is not presented</p> |
| Jibb_2017 [29]     | Pain Squad+ | Intervention | <p>End users<br/>N = 16<br/>Cycle 1 (n = 4)<br/>Cycle 2 (n = 6),<br/>Cycle 3 (n = 6)</p> <p>Characteristics<br/>Adolescents with cancer, ranged in age from 12 to 18 years (mean = 14.8; SD = 2.1), 9 female, 7 male.</p> | <p>Adolescents were asked to complete the app (pain assessment, pain management, and gamification mechanics)</p>                                                                           | <p>Satisfaction<br/>Efficiency<br/>Effectiveness</p> | <p>Think aloud approach<br/>Audio-recording and field notes<br/>Semi-structured interview<br/>Recording of time to complete the pain assessment</p> | <p>All participants but one were able to complete the tasks in a single session.<br/>Participants across all testing cycles stated that Pain Squad+ was easy to use.<br/>The time to complete the pain assessment component of the app across all iterative cycles was 4.3 ± 3.5 minutes (M ± SD; range = 1.9-14.3 minutes).<br/>All participants across the 3 cycles were satisfied with the Pain Squad+ app.</p> |                                       |
| Jibb_2018 [30]     | Pain Squad+ | Intervention | <p>End users<br/>N = 20</p> <p>Characteristics<br/>Adolescents with cancer (12-18 years)</p>                                                                                                                              | <p>Adolescents were asked to complete the app</p>                                                                                                                                          | <p>Satisfaction<br/>Effectiveness</p>                | <p>Count number of registers on the app<br/>Semi-structured telephone interview audio-recorded, with field notes</p>                                | <p>95% (n=19) of the participants completed the entire pilot study. Every adolescent endorsed the ease of use of Pain Squad+. All participants endorsed pain management advice, design and gamification mechanics.</p>                                                                                                                                                                                             |                                       |
| De Knegt_2016 [31] | STOP-ID!    | Assessment   | <p>End users<br/>N = 40</p> <p>Characteristics</p>                                                                                                                                                                        | <p>1) Patients were asked if they were currently</p>                                                                                                                                       | <p>Efficiency,<br/>Effectiveness</p>                 | <p>Qualitative observations</p>                                                                                                                     | <p>All participants finished the STOP-ID! The average performance time was 14.6 min (SD)43.9)</p>                                                                                                                                                                                                                                                                                                                  |                                       |

|                               |                     |            |                                                                                                                                              |                                                                                                                                                                                               |               |                                                                                                                                                                                                     |                                                                                                                                                                                                                                                                                                                                                                                                                                                                                       |  |
|-------------------------------|---------------------|------------|----------------------------------------------------------------------------------------------------------------------------------------------|-----------------------------------------------------------------------------------------------------------------------------------------------------------------------------------------------|---------------|-----------------------------------------------------------------------------------------------------------------------------------------------------------------------------------------------------|---------------------------------------------------------------------------------------------------------------------------------------------------------------------------------------------------------------------------------------------------------------------------------------------------------------------------------------------------------------------------------------------------------------------------------------------------------------------------------------|--|
|                               |                     |            | Adults with Down syndrome, average age of 43.3 years (SD¼11.7, range: 20–66 years)                                                           | <p>experiencing pain;</p> <p>2) locate the pain;</p> <p>3) classify pain intensity;</p> <p>4) assess pain affect selecting Pictograms;</p> <p>5) assess pain Quality selecting Pictograms</p> |               | <p>Performance evaluation following a form (e.g., presence of distraction or impulsivity);</p> <p>Time to complete the test;</p> <p>Number of times that the instructions needed to be repeated</p> | <p>48% of the participants seemed at times distracted or bored and, 35% appeared to answer at least a few questions impulsively</p> <p>7 participants were able to use the tool independently, 4 needed assistance with the device, 16 needed assistance in the questions about the comprehension tests and/or self-report of pain, and 13 needed assistance with both the features.</p> <p>Verbal and/or non-verbal requests of assistance were made by 70% of the participants.</p> |  |
| <b>Kaltenhauser_2018 [32]</b> | Quiri               | Assessment | <p>End users<br/>N = 3 adults</p> <p>Experts<br/>N = 3</p>                                                                                   | Three tasks (not specified)                                                                                                                                                                   | Effectiveness | <p>Successful completion of tasks</p> <p>Discussions with physicians</p>                                                                                                                            | <p>All participants completed the three tasks.</p> <p>The ease of use and short interaction time to complete a measurement were highlighted as particularly valuable by the physicians.</p>                                                                                                                                                                                                                                                                                           |  |
| <b>Jaatun, E_2013 [33]</b>    | Pain Body Map (PBM) | Assessment | <p>End users<br/>N = 10</p> <p>Characteristics<br/>Patients with advanced cancer (both in the first and second versions of the iPad PBM)</p> | <p>1) Mark the area of pain in the body map,</p> <p>2) Select the intensity of the pain by selecting the image of the corresponding numbered colouring pencil/radio button.</p>               | Effectiveness | <p>Observation of task execution – completion rates</p>                                                                                                                                             | <p>First version<br/>3 of the 10 patients had no problem using the iPad and complete tasks;<br/>5 were able to mark intensity but needed orientation;<br/>2 patients were not able to give any input on the iPad (one was too frail and the other was unable to follow instructions).</p> <p>Second Version</p>                                                                                                                                                                       |  |

|                 |                          |            |                                                                                    |                                                                                                                                                                                                            |                                              |                                                                                                                      |                                                                                                                                                                                                                                                                                                                                                                          |                                                                                                                  |
|-----------------|--------------------------|------------|------------------------------------------------------------------------------------|------------------------------------------------------------------------------------------------------------------------------------------------------------------------------------------------------------|----------------------------------------------|----------------------------------------------------------------------------------------------------------------------|--------------------------------------------------------------------------------------------------------------------------------------------------------------------------------------------------------------------------------------------------------------------------------------------------------------------------------------------------------------------------|------------------------------------------------------------------------------------------------------------------|
|                 |                          |            |                                                                                    |                                                                                                                                                                                                            |                                              |                                                                                                                      | 8 participants completed the tasks without support; 2 patients were not able to fill in anything at all due to drowsiness /sleepiness and having problems following instructions.                                                                                                                                                                                        |                                                                                                                  |
| Diana_2012 [34] | No reference to app name | Assessment | End users<br>N = 5 (woman with fibromyalgia)                                       | Not specified                                                                                                                                                                                              | Satisfaction<br>Effectiveness<br>Efficiency* | Mock-ups of the app<br>Questionnaire<br>Recording of the sessions<br>Success/failure rates<br>Time to complete tasks | All the participants were able to give ratings in the three scales.<br><br>100% of the users found the device was easy to use<br><br>75% of the users thought they would be able to use the device.<br><br>75% of the users had difficulties to understand how to advance (did not understand the metaphor of the button, represented by an arrow.                       | The authors only present the mean time of each session, they make no reference to the time to complete the tasks |
| Caon_2019 [35]  | My Pain Coach            | Assessment | End users<br>N = 6<br>Characteristics<br>People without any chronic pain condition | 1) Register;<br>2) create a new "pain entry" with Tangible Interface;<br>3) create a new "pain entry" with Touch screen;<br>4) View reports and visualize "Pain map";<br>5) Insert a password for doctors. | Satisfaction<br>Efficiency<br>Effectiveness  | SUS<br>Recording of time to complete tasks<br>Completion rates of the tasks                                          | The SUS score assessed usability as "excellent" (mean result of all users was 82,5±5,7); users perceived this system as easy-to-use.<br><br>Time to complete tasks (in seconds) ± SD (mean of the 6 users):<br>task1 – 141±72;<br>task2 – 229±71;<br>task3 - 153±55;<br>task4 - 31±14<br>task5 - 33±13<br><br>Success rate - 100% (all participants completed all tasks) |                                                                                                                  |

|                            |                     |                     |                                                                                                                                                                                                                                                                                                                    |                                                                                                                                                                                                                                                                                   |                                                      |                                                                                                                                                                                                                                                           |                                                                                                                                                                                                                                                                                                                                                                                                                                                                                                |  |
|----------------------------|---------------------|---------------------|--------------------------------------------------------------------------------------------------------------------------------------------------------------------------------------------------------------------------------------------------------------------------------------------------------------------|-----------------------------------------------------------------------------------------------------------------------------------------------------------------------------------------------------------------------------------------------------------------------------------|------------------------------------------------------|-----------------------------------------------------------------------------------------------------------------------------------------------------------------------------------------------------------------------------------------------------------|------------------------------------------------------------------------------------------------------------------------------------------------------------------------------------------------------------------------------------------------------------------------------------------------------------------------------------------------------------------------------------------------------------------------------------------------------------------------------------------------|--|
| <p>Birnie, K_2018 [36]</p> | <p>Achy Penguin</p> | <p>Intervention</p> | <p>End users<br/>N = 20 (Cycle 1, n=6,<br/>Cycle 2 and 3, n= 7)<br/>Characteristics<br/>4 to 7 year-old children<br/>(mean age 5.8 years)</p> <p>Experts<br/>N = 2<br/>Characteristics<br/>Child life specialists at<br/>Seattle Children’s<br/>Hospital reviewed and<br/>tested the initial app<br/>prototype</p> | <p>The participants progressed through all aspects of the app, including pain assessment (pain location and intensity) and pain management strategies</p>                                                                                                                         | <p>Satisfaction<br/>Efficiency<br/>Effectiveness</p> | <p>Qualitative interview;<br/>Think aloud approach (likes, dislikes, and difficulties using the app);<br/>Field notes on children’s responses (taken by research assistants);<br/>Recording of the length of time children engaged with app features.</p> | <p>Time engagement with app features:<br/>Pain intensity (M, SD, range in seconds):<br/>Cycle1 - 44.2, ±22.9, 30–90<br/>Cycle2 - 21.7, ±20.1, 10–60<br/>Cycle3 - 24.7, ±18.2, 10–60</p> <p>Pain location (M, SD, range in seconds):<br/>Cycle1 - 90.0, ±53.7, 30–180<br/>Cycle2 - 23.6, ±18.4, 15–60<br/>Cycle3 - 40.0, ±30.3, 10–90</p> <p>Self-management strategies (M, SD, range in minutes):<br/>Cycle1 – 7.7, ±2.7, 3–10<br/>Cycle2 - 9.1, ±3.5, 6–16<br/>Cycle3 - 14.0, ±1.8, 11–16</p> |  |
| <p>Sun_2018 [37]</p>       | <p>Panda</p>        | <p>Assessment</p>   | <p>End users<br/>N = 17</p> <ul style="list-style-type: none"> <li>• 12 parents (4 in round 1, 3 in round 2, 5 in round 3),</li> <li>• 5 adolescents (round 3)</li> </ul> <p>Experts<br/>N = 13 nurses (6 in round 1, 7 in round 2)</p>                                                                            | <p>a) Enter child and scheduled medication<br/>b) Respond to app alert, performing a pain assessment and complete checks for medication administration, and then edit the status of the medication<br/>c) Respond to a notification when a medication has already been given,</p> | <p>Efficiency<br/>Effectiveness<br/>Satisfaction</p> | <p>1) Task errors rate<br/>2) Task completion rate<br/>3) Time to complete tasks<br/>4) “think aloud” and was audio-recording of the sessions.<br/>5) Computer System Usability Questionnaire (CSUQ)<br/>5) Unstructured interview</p>                    | <p>All users were able to successfully complete tasks a) and b).</p> <p>Nurses tended to perform better in terms of task completion rate and time, as well as task error rates</p> <p>Users’ CSUQ responses had median [IQR] score of 2 [1-4]; 67% of users indicated that they would use Panda for management of postoperative pain.</p> <p>93% of participants reported the app was easy to use</p>                                                                                          |  |

|                      |                                   |            |                                                                                                        |                                                                                                                                                    |                                             |                                                                                                                                         |                                                                                                                                                                                                                                                                                                                                                                                                                                                                                                                                                                                     |                                              |
|----------------------|-----------------------------------|------------|--------------------------------------------------------------------------------------------------------|----------------------------------------------------------------------------------------------------------------------------------------------------|---------------------------------------------|-----------------------------------------------------------------------------------------------------------------------------------------|-------------------------------------------------------------------------------------------------------------------------------------------------------------------------------------------------------------------------------------------------------------------------------------------------------------------------------------------------------------------------------------------------------------------------------------------------------------------------------------------------------------------------------------------------------------------------------------|----------------------------------------------|
|                      |                                   |            |                                                                                                        | d) Schedule medication, edit and delete existing medication.                                                                                       |                                             |                                                                                                                                         |                                                                                                                                                                                                                                                                                                                                                                                                                                                                                                                                                                                     |                                              |
| Yen_2016 [38]        | RhEumAtic Disease activiY (READY) | Assessment | End users<br>N = 33 patients<br>N = 15 physicians                                                      | 1) Completing questionnaires, 2) Navigate the system, 3) Patient and physician assessment of pain 4) Documenting medications, 5) interpret results | Satisfaction<br>Effectiveness<br>Efficiency | 1) Think Aloud protocol<br>2) Video-recording of interactions with READY<br>3) Comparison of the time using READY and paper evaluation. | Usability issues were found in touchscreen sensitivity, interface design, interactive features, and instruction and error messages. Despite these issues, 75.76% patients reported they liked READY.<br>About 37% of patients found touch screen sensitivity was not sensitive enough to complete an action. Physicians faced similar issues.<br><br>Comparing the times, results show that patients spent more time on READY than paper (mean=4.39 mins, SD=2.29 vs. mean=2.26 mins, SD=1.36, p=0.002). In this matter, physicians also revealed concerns about clinical workflow. |                                              |
| De La Veja_2014 [39] | Painometer                        | Assessment | End users<br>N = 14 (non-professionals, with history of pain)<br><br>Experts<br>N = 19 (professionals) | Assessing pain intensity with the scales; see list of scales; see description of the scale and instructions; choose or change scale.               | Satisfaction<br>Effectiveness               | Semi-structured interview<br><br>Open-ended questions<br><br>Recording of errors<br><br>Recording of sessions and field notes           | Most of health care professionals (n=18, 95%) preferred Painometer to traditional versions of the scales.<br><br>Participants completed the tasks, but 3 (1 non-professional and 2 professionals) had some difficulties with the buttons size.                                                                                                                                                                                                                                                                                                                                      | Results of the task errors are not presented |

|                              |              |              |                                                                                                                                              |                                                                                                                                                                                                    |              |                                                                                                                                                      |                                                                                                                                                                                                                                                                     |                                                               |
|------------------------------|--------------|--------------|----------------------------------------------------------------------------------------------------------------------------------------------|----------------------------------------------------------------------------------------------------------------------------------------------------------------------------------------------------|--------------|------------------------------------------------------------------------------------------------------------------------------------------------------|---------------------------------------------------------------------------------------------------------------------------------------------------------------------------------------------------------------------------------------------------------------------|---------------------------------------------------------------|
|                              |              |              |                                                                                                                                              |                                                                                                                                                                                                    |              | Tasks completion rates<br>Think Aloud approach                                                                                                       |                                                                                                                                                                                                                                                                     |                                                               |
| <b>De La Veja_2018 [40]</b>  | Fibroline    | Intervention | End users<br>N = 25<br>Characteristics<br>13 to 24 years (mean age = 18.24; SD = 4.02), 8 males (32%) and 17 females (68%) with fibromyalgia | Log in the app, change settings, access certain resources—read a PDF file, listen to an audio, and watch a video, set an alarm for medication, go back to the main screen                          | Satisfaction | Semi structured interview (Yes/No questions and open-ended questions)<br>Field notes of the sessions and recording of errors<br>Think Aloud approach | All participants (100%) rated Fibroline as “Easy to use.”<br>All participants (100%) would use Fibroline if they needed it.<br>Problems reported using the app - finding button to access chart, setting alarm, choose to see some content in text or video format. | The results of the recorded mistakes are not presented.       |
| <b>Suso-Ribera_2018 [41]</b> | Pain Monitor | Assessment   | End Users<br>N = 38 (patients with chronic pain; mean age 42.74, SD = 9.92)<br>Experts<br>N = 7 (two psychologists and five physicians)      | Evaluate pain (twice a day for 30 days)                                                                                                                                                            | Satisfaction | System Usability Scale (SUS)                                                                                                                         | All participants (100%) found the app extremely easy to use.                                                                                                                                                                                                        | The total score of SUS is not presented                       |
| <b>Spyridonis_2012 [42]</b>  | PainDroid    | Assessment   | End users<br>N = 7 (wheelchair users over 18 years old)                                                                                      | 1. Start the app<br>2. Rotate left/right, rotate up/down<br>3. Re-center<br>4. Zoom in/out and drag<br>5. Reset<br>6. Use above to select pain type and pain location on model<br>7. Save and exit | Satisfaction | Questionnaire adapted from SUS                                                                                                                       | The wheelchair users’ evaluation highlighted positive bias in respect of the application’s usability and functionality<br>There was a positive trend in the question 3, referring to ease of use (Mean=4 St. Dev.=1)                                                | Total score of the SUS adapted questionnaire is not presented |

|                                |                           |            |                                                                                                                                                                                                                                   |                                                                                                                             |                            |                                                                                                                                    |                                                                                                                                                                                                                                                                           |
|--------------------------------|---------------------------|------------|-----------------------------------------------------------------------------------------------------------------------------------------------------------------------------------------------------------------------------------|-----------------------------------------------------------------------------------------------------------------------------|----------------------------|------------------------------------------------------------------------------------------------------------------------------------|---------------------------------------------------------------------------------------------------------------------------------------------------------------------------------------------------------------------------------------------------------------------------|
| <b>Vanderboom_2014 [43]</b>    | My Pain Diary             | Assessment | End users<br>N = 20 (patients who had complete an existing fibromyalgia treatment)                                                                                                                                                | Enter the app to rate pain, fatigue and activity.                                                                           | Satisfaction               | 1) Perceived Ease of Use (PEU) scale<br><br>2) Perceived Usefulness (PU) scale<br><br>3) Frequency of use                          | 80% of the participants found the device easy to use, 75% found it easy to interact with and 70% thought it was easy to configure<br><br>75% of the users felt the app was useful to manage their condition<br><br>Frequency of use over 7 days (in days) – 5.2±2.2(M±SD) |
| <b>Bedson, J_2019 [44]</b>     | Keele Pain Recorder (KPR) | Assessment | End Users<br>N= 21 (13 females and 8 males); median age 62 (IQR 50 to 70)<br><br>Experts<br>N = 17 (General Practitioners, physiotherapists, research nurses, primary care researchers, research facilitators, and an IT manager) | Enter pain recordings (twice daily for a period of 4 weeks)                                                                 | Effectiveness Satisfaction | Completion rates<br><br>Follow-up questionnaire<br><br>Think aloud approach (Workshop)<br><br>Semi-structured telephone interviews | Participants entered 862 records. Frequency of app use - 9/18 daily/often, 0/18 never. Patients found the KPR easy to use. General Practitioners found the graphical output easy to interpret.                                                                            |
| <b>Stefke_2018 [45]</b>        | Migraine Monitor          | Assessment | End users<br>N = 21 subjects (71% female, age 31±13 (M±SD))                                                                                                                                                                       | Use the migraine diary function over a period of two weeks to register migraine attacks and to document daily mood changes. | Satisfaction               | SUS                                                                                                                                | Overall, the application reached a SUS score of 91.67±6.96 (M ± SD).<br><br>The average responses to the question “I think that I would use this system frequently” were considerably worse (2.71±1.41) compared to the average score of all other questions (3.77±0.52). |
| <b>Turner-Bowker_2011 [46]</b> | HEADACHE-CAT              | Assessment | End users<br>N = 9 headache sufferers (6 women and 3 men, age range, 27-54; mean, 38 years.                                                                                                                                       | Participants navigated the survey and responded to the                                                                      | Satisfaction               | 1) Structured interviews to gather user feedback on interface, visual                                                              | Participants reported that the stylus was “easy” or “extremely easy” to use.                                                                                                                                                                                              |



|                         |                                                       |              |                                                                                                                                                   |                                                                                                                                                                                                                                                  |                               |                                                                                                                                             |                                                                                                                                                                                                                                                                                                                                                                                                                                                                                                                                                  |
|-------------------------|-------------------------------------------------------|--------------|---------------------------------------------------------------------------------------------------------------------------------------------------|--------------------------------------------------------------------------------------------------------------------------------------------------------------------------------------------------------------------------------------------------|-------------------------------|---------------------------------------------------------------------------------------------------------------------------------------------|--------------------------------------------------------------------------------------------------------------------------------------------------------------------------------------------------------------------------------------------------------------------------------------------------------------------------------------------------------------------------------------------------------------------------------------------------------------------------------------------------------------------------------------------------|
|                         |                                                       |              |                                                                                                                                                   | survey questions.                                                                                                                                                                                                                                |                               | design and navigation;<br>2) Observation of the interviews and the interaction of users with the app;<br>3) Video recording of the process. | Participants were easily able to determine how to begin the survey again, close the application, return to a previous question, and proceed to a subsequent question.                                                                                                                                                                                                                                                                                                                                                                            |
| <b>Huguet_2015 [47]</b> | myWHI diary (my Wireless Headache Intervention diary) | Assessment   | End users<br>Cycle 1 (N=11)<br>Cycle 2 (N=19)<br>Cycle 3 (N=13)<br><br>Characteristics<br>Adolescents and young adults, age range 14-28years old. | Use the diary for 14 days.<br>Report occurrence of headache: start and ending time, intensity, location, trigger(s), headache quality, highest pain intensity.<br>Enter additional information (e.g., overall mood, hours and quality of sleep). | Effectiveness<br>Satisfaction | Closed-ended questionnaire<br><br>Adherence and completion rates<br><br>Semi-structured interviews in the end of app use                    | A minority of participants completed all daily entries (18%, n=2) in cycle 1.<br>In cycle 2, participants completed headache entries closer to the pain beginning time than in Cycle 1 (Cycle 2 mdn=3.83h vs Cycle 1 mdn=13.59h). Adherence was also improved, 26% of participants (n=5) completed all 14 daily entries.<br>Cycle 3, the majority of participants' headache entries during Cycle 3 were made on the same day that the episode occurred.<br><br>In all three cycles, most participants rated the app as easy to use and navigate. |
| <b>Minen_2018 [48]</b>  | RELAXaHEAD                                            | Intervention | End users<br>N = 12<br><br>Characteristics<br>Adults with headache, 80% female (mean age was 37.5615.97, range 20-74 years).                      | Entry of daily headache diary data;<br>Enter medications used;<br>Register sleep data                                                                                                                                                            | Satisfaction                  | Think Aloud approach and Scripted protocol<br><br>Recording of the sessions<br><br>Likert-scaled questions about satisfaction               | 75% of the participants thought the diary was easy to use, 75% agreed that it was relevant to help track their headaches, 83% thought the information in the app was easy to understand, 75% agreed that the app kept their interest and attention during the session.                                                                                                                                                                                                                                                                           |

|                               |                          |              |                                                                                                                                                                                                                                                      |                                                                                                                                                          |                            |                                                                                                                                                 |                                                                                                                                                                                                                                                                                                                                                                                                                                                             |
|-------------------------------|--------------------------|--------------|------------------------------------------------------------------------------------------------------------------------------------------------------------------------------------------------------------------------------------------------------|----------------------------------------------------------------------------------------------------------------------------------------------------------|----------------------------|-------------------------------------------------------------------------------------------------------------------------------------------------|-------------------------------------------------------------------------------------------------------------------------------------------------------------------------------------------------------------------------------------------------------------------------------------------------------------------------------------------------------------------------------------------------------------------------------------------------------------|
|                               |                          |              |                                                                                                                                                                                                                                                      |                                                                                                                                                          |                            |                                                                                                                                                 | 92% of the participants indicated that they would use the app again.                                                                                                                                                                                                                                                                                                                                                                                        |
| <b>Stinson_2013 [49]</b>      | Pain Squad               | Assessment   | <p>End users<br/>Low-fidelity<br/>N = 15 adolescents (5 per cycle)</p> <p>High-fidelity<br/>N = 18 (1st cycle)<br/>N = 8 (2nd cycle)</p> <p>Experts<br/>N = 20</p> <p>Characteristics<br/>10 pediatric oncologists<br/>10 pediatric pain experts</p> | To complete the app, recording their own pain.                                                                                                           | Satisfaction Effectiveness | <p>Semi-structured, audio-taped interviews</p> <p>Register of entries in the system</p>                                                         | <p>Low-Fidelity<br/>Participants made positive comments on the appearance of the app screenshots;<br/>Participants suggested several changes to improve usability of the game-based app</p> <p>High Fidelity<br/>Every adolescent interviewed said they would use the app daily for an extended period;<br/>All participants found the app to be “easy to understand” and “easy to navigate”.<br/>100% entries were completed within the 2-week period.</p> |
| <b>Hochstenbach_2016 [50]</b> | No reference to app name | Intervention | <p>End users<br/>N = 11 (patients with moderate to severe cancer pain, 5 males, 6 females)</p>                                                                                                                                                       | 1) Register pain, adverse effects, interference of pain with activity or sleep, and satisfaction with pain treatment; 2) register pain medication taken. | Satisfaction Effectiveness | <p>Questionnaire to assess learnability, usability and desirability (Likert-scale)</p> <p>Completion rates</p> <p>Semi-structured interview</p> | <p>Patient quickly learned how to use the app (mean=4.8, SD=0.4).</p> <p>Average completion rates were 76.8% for pain monitoring, 50.4% for medication monitoring and 100% for education sessions.</p> <p>Patients completed, on average, 43 (SD 12.4) out of the 56 diaries.</p> <p>Overall, patient considered the app clear and simple.</p>                                                                                                              |
| <b>Fortier_2016 [51]</b>      | Pain Buddy               | Intervention | <p>End users<br/>N = 12</p> <p>Characteristics<br/>Children with diagnose of cancer, ages 8-18 (12.33+/-3.42; 58% male)</p>                                                                                                                          | Complete the symptom diary twice daily for a 10 day period                                                                                               | Satisfaction Effectiveness | <p>Queries with a likert-type scale about usefulness and ease of use;</p>                                                                       | <p>Mean number of completed diaries – 19.58 (SD=4.64; range 13-27)</p> <p>Participants were satisfied with the app</p>                                                                                                                                                                                                                                                                                                                                      |

|                     |                          |              |                                                                                                                                                                                                  |                                                                                                                                                                                                                                                                 |                               |                                                                                                                                                                                                                                                      |                                                                                                                                                                                                                                                                                                                        |
|---------------------|--------------------------|--------------|--------------------------------------------------------------------------------------------------------------------------------------------------------------------------------------------------|-----------------------------------------------------------------------------------------------------------------------------------------------------------------------------------------------------------------------------------------------------------------|-------------------------------|------------------------------------------------------------------------------------------------------------------------------------------------------------------------------------------------------------------------------------------------------|------------------------------------------------------------------------------------------------------------------------------------------------------------------------------------------------------------------------------------------------------------------------------------------------------------------------|
|                     |                          |              |                                                                                                                                                                                                  |                                                                                                                                                                                                                                                                 |                               | Open-ended questions<br>Completion rates of the diaries                                                                                                                                                                                              |                                                                                                                                                                                                                                                                                                                        |
| Neubert_2018 [52]   | No reference to app name | Assessment   | <p>End users<br/>Study 1<br/>N = 52 patients with chronic pain</p> <p>Study 2<br/>N = 51 patients with chronic pain and<br/>N = 4 doctors</p>                                                    | <p>1) Make a correct symptom drawing on each view of the body outline showing the respective body region,</p> <p>2) Specify the symptom choosing descriptors from a list,</p> <p>3) Specify any pain-related symptom,</p> <p>4) Rate the intensity of pain.</p> | Satisfaction                  | <p><b>End users:</b> usability questionnaire, with 8 Likert-type questions and 2 open questions.</p> <p><b>Experts:</b> Web-based survey comprising the questionnaires:<br/>1) SUS<br/>2) Attrakdiff 2<br/>3) The ISONORM 9241/10 questionnaire.</p> | <p>End users<br/>In study 1, 87% (45/52) of the study patients were content with the body outline</p> <p>Experts<br/>Score of 75.63 on the SUS indicating an overall good usability</p>                                                                                                                                |
| Fledderus_2015 [54] | No reference to app name | Intervention | <p>End users<br/>N = 1<br/>Characteristics<br/>Patient with chronic pain</p> <p>Experts<br/>N = 5<br/>Characteristics<br/>1 target group expert and 4 eHealth experts (mean age - 38, SD 12)</p> | <p>Scenarios with tasks/problems to solve</p> <p>(Tasks are not specified)</p>                                                                                                                                                                                  | Satisfaction                  | <p>Think Aloud approach (verbalizing thoughts during the scenarios)</p> <p>Audio recording of the sessions</p> <p>Evaluation of comments as positive, negative or neutral.</p>                                                                       | <p>Ease of use of the app (e.g., clear navigation, clear buttons, simple) and the design (e.g., fresh, calm) were rated positively.</p> <p>Usefulness of the features also had positive comments.</p> <p>Most negative comments were about the quality of the system as some (technical errors and unclear icons).</p> |
| Cardos_2017 [55]    | BIO-H App                | Intervention | <p>End users<br/>N = 16</p>                                                                                                                                                                      | <p>1) opening the intervention app;</p>                                                                                                                                                                                                                         | Effectiveness<br>Satisfaction | <p>System Usability Scale</p>                                                                                                                                                                                                                        | <p>A mean score of 93.44 (SD=7.06) out of 100 was found for the</p>                                                                                                                                                                                                                                                    |

|                            |                 |            |                                                                                                                      |                                                                                                                                                                                          |                                       |                                                                                                                                                                                                                                                                        |                                                                                                                                                                                                                                                                                                                                                                                                                               |                            |
|----------------------------|-----------------|------------|----------------------------------------------------------------------------------------------------------------------|------------------------------------------------------------------------------------------------------------------------------------------------------------------------------------------|---------------------------------------|------------------------------------------------------------------------------------------------------------------------------------------------------------------------------------------------------------------------------------------------------------------------|-------------------------------------------------------------------------------------------------------------------------------------------------------------------------------------------------------------------------------------------------------------------------------------------------------------------------------------------------------------------------------------------------------------------------------|----------------------------|
|                            |                 |            | <p>Characteristics<br/>Females (mean age = 42,43)</p>                                                                | <p>2) read the information about the intervention;<br/>3) fill pre-intervention survey;<br/>4) listen to the audio relaxation exercise;<br/>5) fill out the post-intervention survey</p> |                                       | <p>Structured Questionnaire</p> <p>Task completion rates</p>                                                                                                                                                                                                           | <p>overall usability based on the participants' SUS ratings.</p> <p>People found the intervention component to be useful (m=8.63 out of 10; SD = 1.14) and they indicated a high level of willingness to access the app in the future (m=8.56; out of 10; SD=1.71).</p> <p>All tasks were completed successfully, and participants commented on how easy the interface was to navigate.</p>                                   |                            |
| <b>Boceta, J_2019 [56]</b> | App INES-DIO    | Assessment | <p>End users<br/>N = 175 physicians</p>                                                                              | <p>Open a new profile for each patient and go through four sequential steps to collect relevant clinical information for an enhanced diagnosis procedure of BTcP.</p>                    | <p>Satisfaction<br/>Effectiveness</p> | <p>Structured questionnaire</p> <p>Assessment test related to usability (included as last feature of the app)</p> <p>Follow-up questions about the app design, overall usefulness, and use intention</p> <p>Utilization rates of the app and each assessment scale</p> | <p>Most clinicians (157/175, 89.7%) concluded that the mobile app is well designed and easy to use</p> <p>94.9% (166/175) of participants would likely/most likely recommend the use of App INES-DIO.</p> <p>The app was used as often as two or three times a week by 41.7% (74/175) of clinicians.</p> <p>Pain-rating and functional assessment scales were the most frequent tools used by clinicians (93.3%, 163/175)</p> | <p>Boceta, J_2019 [56]</p> |
| <b>Docking_2018 [57]</b>   | iPhone pain app | Assessment | <p>End users<br/>N = 24</p> <p>Characteristics<br/>Trainee paramedics (46% females and 54% males)</p> <p>Experts</p> | <p>Participants were asked to work their way through the app, trialling out different routes.</p>                                                                                        | <p>Satisfaction</p>                   | <p>4 focus groups with trainee paramedics</p> <p>Direct questions related to changes/ recommendations</p>                                                                                                                                                              | <p>Focus group revealed concerns around the usability of technological devices within the paramedic setting and whether it is professional to use them in practice.</p>                                                                                                                                                                                                                                                       |                            |

|  |  |  |                                                                      |  |  |                                      |                                                                                                                                                                              |
|--|--|--|----------------------------------------------------------------------|--|--|--------------------------------------|------------------------------------------------------------------------------------------------------------------------------------------------------------------------------|
|  |  |  | N= 7<br>Characteristics<br>Paramedics (86% males<br>and 14% females) |  |  | Delphi Panel of<br>Paramedic Experts | Some suggestions were related<br>to making the app more<br>intuitive, in particular the<br>location of the "next" and<br>"back" buttons and the<br>correction of some links. |
|--|--|--|----------------------------------------------------------------------|--|--|--------------------------------------|------------------------------------------------------------------------------------------------------------------------------------------------------------------------------|
